# Supplementary material for: Robust and highly adaptable high internal phase gel emulsions stabilized solely by a natural saponin hydrogelator glycyrrhizic acid
Source: Royal Society of Chemistry journal article supplement (doi:10.1039/d1fo01656c), 2021-11-22

## Supplementary Information

### **Robust and highly adaptable high internal phase gel emulsions stabilized solely by a natural saponin hydrogelator glycyrrhizic acid**

Mengyue Xu,<sup>1,#</sup> Lulu Ma,<sup>1,#</sup> Qing Li,<sup>1</sup> Jiahao Wu,<sup>2</sup> Zhili Wan,<sup>1,2,3,\*</sup> To Ngai,<sup>2,\*</sup> and Xiaoquan Yang<sup>1</sup>

<sup>1</sup> Laboratory of Food Proteins and Colloids, School of Food Science and Engineering, Guangdong Province Key Laboratory for Green Processing of Natural Products and Product Safety, South China University of Technology, Guangzhou 510640, China

<sup>2</sup> Department of Chemistry, The Chinese University of Hong Kong, Shatin, N. T., Hong Kong, China

<sup>3</sup> Overseas Expertise Introduction Center for Discipline Innovation of Food Nutrition and Human Health (111 Center), Guangzhou 510640, China

\*Corresponding author

Zhili Wan, E-mail: [zhiliwan@scut.edu.cn](mailto:zhiliwan@scut.edu.cn)

Fax: (086) 20-87114263

To Ngai, E-mail: [tongai@cuhk.edu.hk](mailto:tongai@cuhk.edu.hk)

Fax: (852) 26035057; Tel: (852) 39431223

# These authors contributed equally to this work.

**Fig. S1** (a) Photographs of GA nanofibril solutions (0.1-2 wt%) after storage at room temperature (25 °C) for 12 h, and a transparent hydrogel is formed when the nanofibril concentration exceeds 0.25 wt%. (b and c) TEM images of a thin layer of the 0.5 wt % GA fibrillar hydrogel.

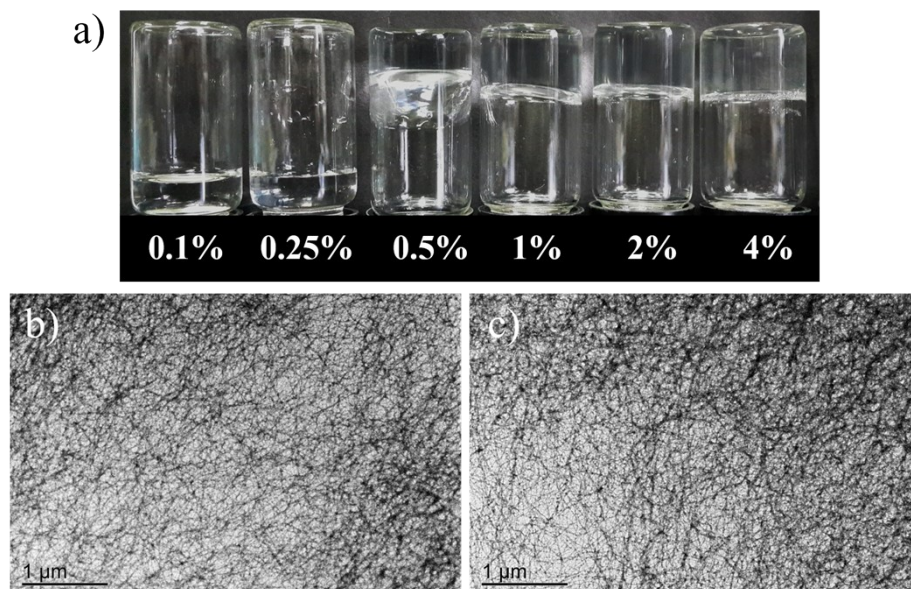

**Fig. S2** (a) Photographs and (b) frequency sweeps of HIPEs with 80 vol% sunflower oil prepared at different GA nanofibril concentrations (0.1-5 wt%) after 30 days of storage at room temperature (25 °C). Filled symbols in (b) represent  $G'$  and open symbols represent  $G''$ .

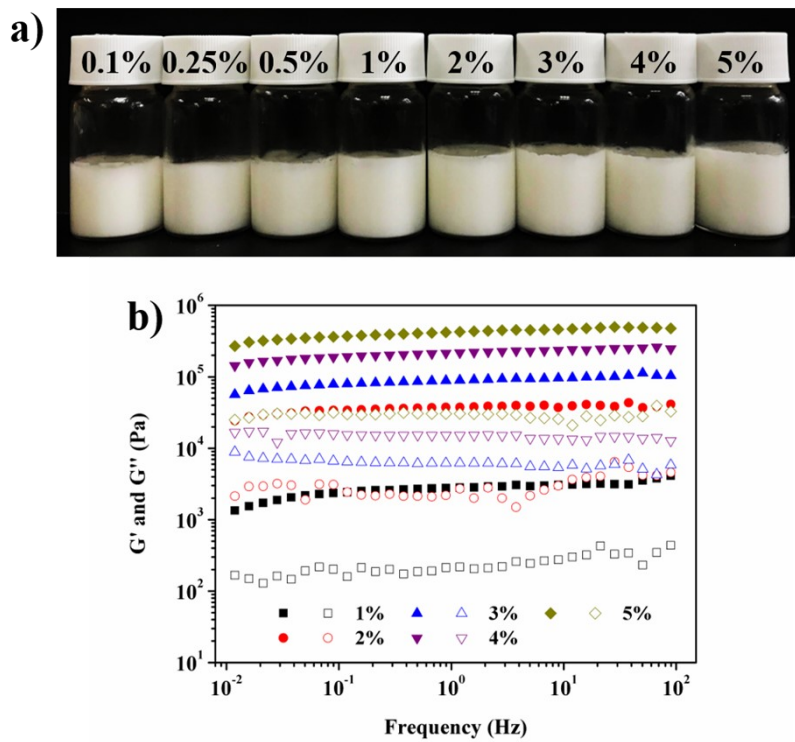

**Fig. S3** Photographs of gel-HIPEs with different oil phase fractions (75-90 vol%) prepared at 5 wt% GA nanofibrils.

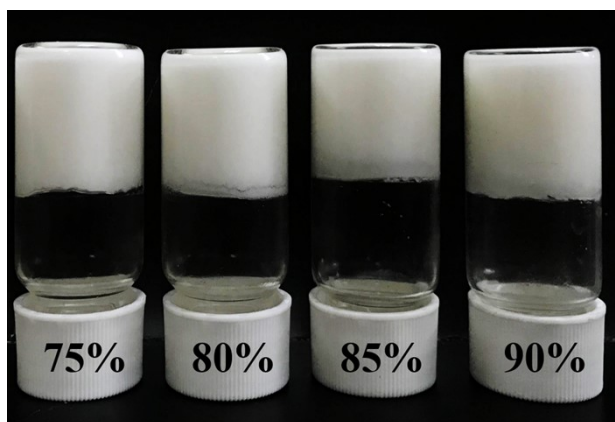

**Fig. S4** Magnified CLSM images of HIEs with 80 vol% sunflower oil prepared at different GA nanofibril concentrations: (a) 0.25 wt%, (b) 0.5 wt%, and (c) 1 wt%. All scale bars are 25  $\mu\text{m}$ .

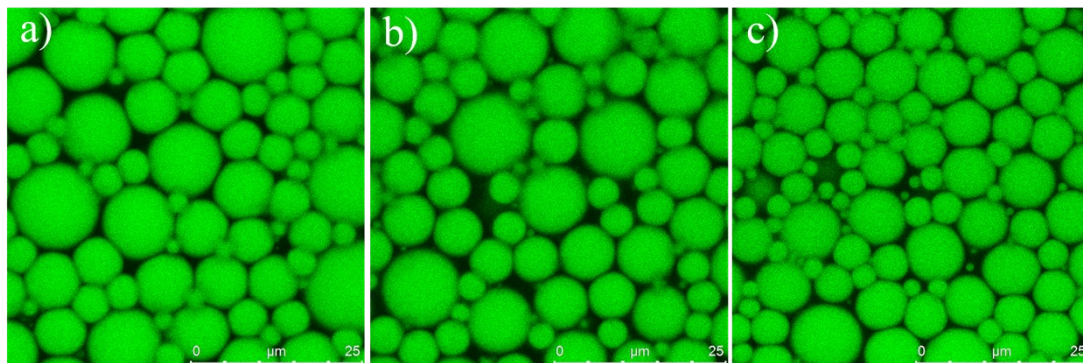

**Fig. S5** FE-SEM images of freeze-dried gel-HIPEs with 80 vol% hexane prepared by 5 wt% GA nanofibrils. Scale bars: (a) 10  $\mu\text{m}$  and (b) 2  $\mu\text{m}$ .

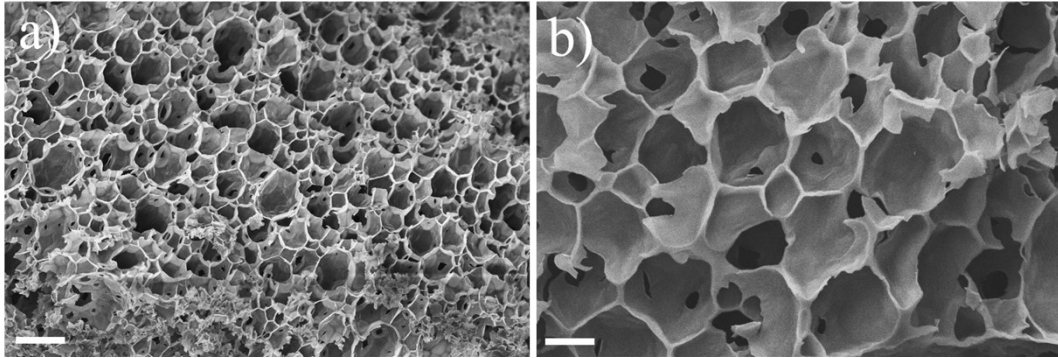

Supplement: d1fo01656c1.pdf [file d1fo01656c1.pdf]
